# Supplementary material for: Quantum chemistry meets high-resolution spectroscopy for characterizing the molecular bricks of life in the gas-phase
Source: Royal Society of Chemistry journal article supplement (doi:10.1039/d3cp05169b), 2023-11-29
Supplement: d3cp05169b1.pdf [file d3cp05169b1.pdf]

**Supporting Information:**

**Quantum Chemistry Meets High-Resolution  
Spectroscopy for Characterizing the Molecular  
Bricks of Life in the Gas-Phase**

Vincenzo Barone\*

*Scuola Normale Superiore di Pisa, piazza dei Cavalieri 7, 56126 Pisa, Italy*

E-mail: [vincenzo.barone@sns.it](mailto:vincenzo.barone@sns.it)

---



---

## PCS/BONDS

---



---

### Beta version.

The Pisa Composite Scheme (PCS) in its BONDS variant applies a set of linear corrections to covalent bonds starting from an initial geometry provided as input. The tool is used in three sequential steps:

- Select or deselect the optional valence corrections (on by default).
- Upload the starting geometry using an XYZ or Gaussian LOG file.
- Visualize the refined molecular structure, view its properties and download the refined XYZ geometry file.

The tool employs the redundant internal coordinates and penalty function approach to determine improved Cartesian coordinates.

#### PCS/BONDS

$$r_{PCS/Bonds} = r(rDSD/3F12) + \Delta r_B$$

$$\Delta r_B = \Delta r_{CVB} + \Delta r_{VB}$$

$$\Delta r_{ij}^{CVB} = -k\sqrt{N_i N_j - 1} (r_i^{cov} + r_j^{cov}), N_i = \min(n_i, 3)$$

$$\Delta r_{ij}^{VB} = \Delta r_{ij}^{CVB} \left\{ \left( \sqrt{|P_{ij} - 2|} - 1 \right) [1 - \delta(i, O) - \delta(j, O) + \delta(i, O)\delta(j, O)] \right\} - 0.25(1 - P_{ij})^2 [\delta(i, C)\delta(j, F) + \delta(i, F)\delta(j, C)]$$

DVB correction

### 2. Upload a molecular structure (XYZ or Gaussian LOG file).

azulene\_revDSD\_3F12-.xyz

### 3. Download refined structure and view its properties.

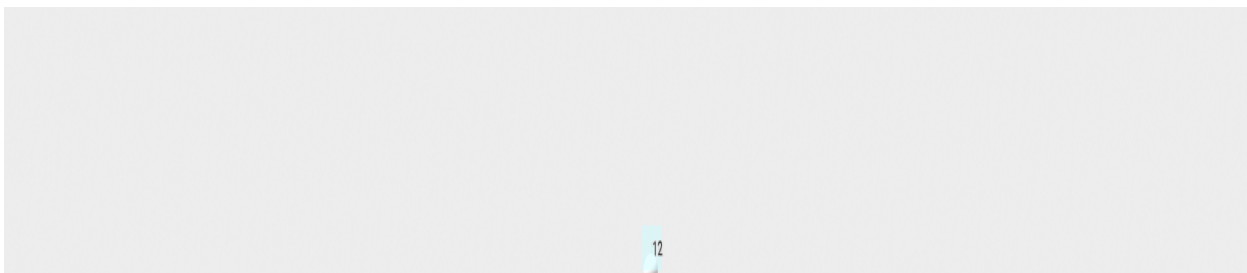

PCS/BONDS

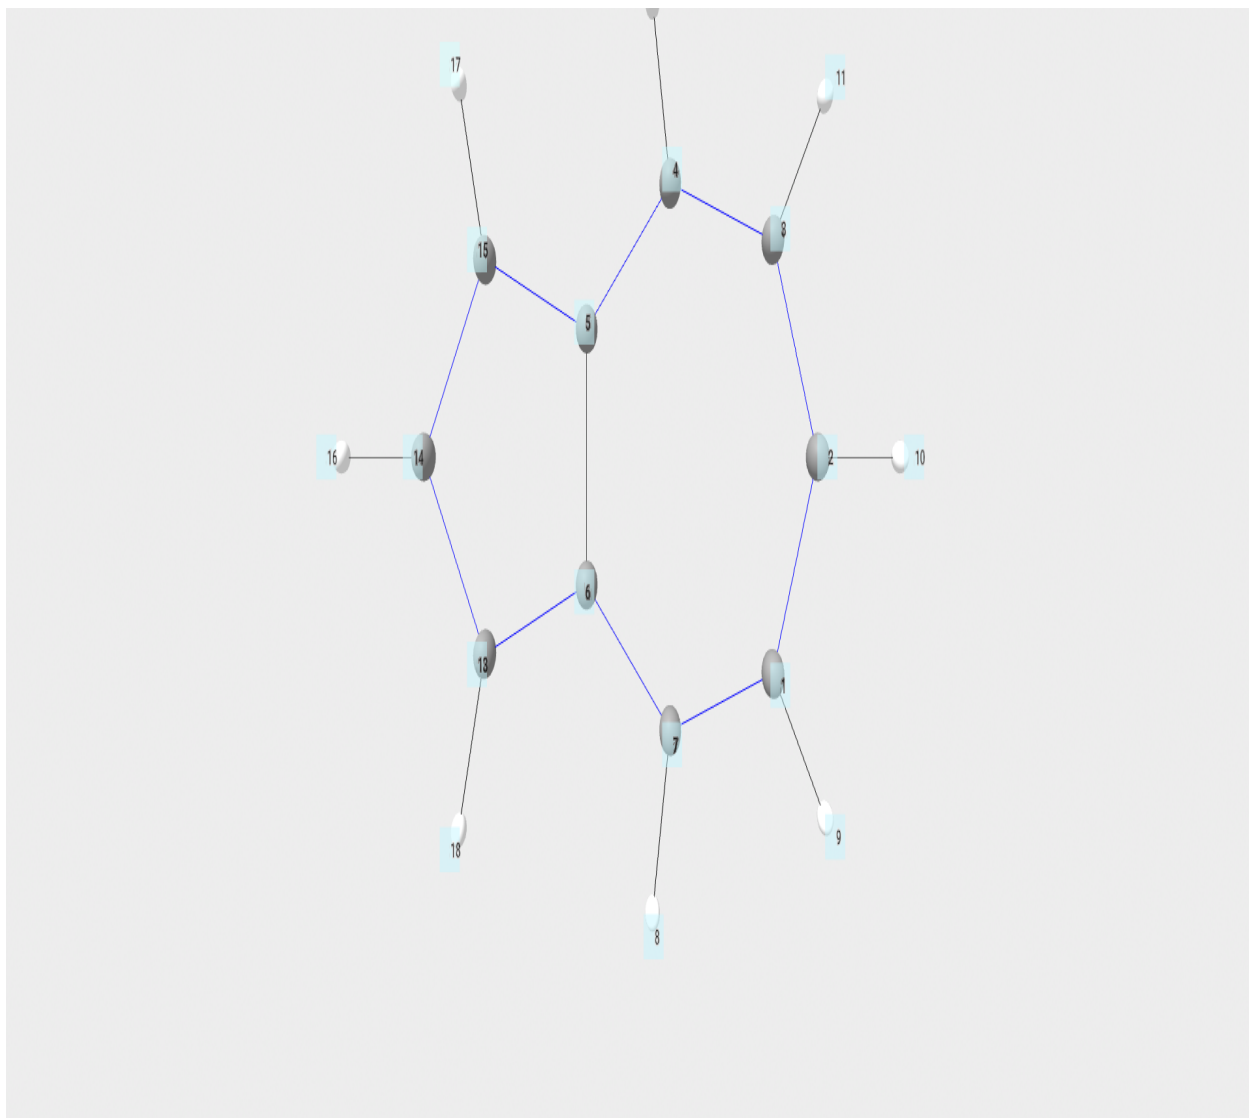

<https://www.skies-village.it/proxima/pcsbonds/>

PCS/BONDS

[Download refined structure](#)

Converged! RMSD(R): 9.997845754158337e-7, MAX(R): 0.000002420441375328153

### Input Structure

```
6 1.913854 -1.263969 0.000000
6 2.504017 -0.000000 0.000000
6 1.913854 1.263969 0.000000
6 0.558209 1.593153 0.000000
6 -0.541981 0.746273 0.000000
6 -0.541981 -0.746273 0.000000
6 0.558209 -1.593153 0.000000
1 0.327070 -2.655939 0.000000
1 2.602115 -2.102763 0.000000
1 3.590234 -0.000000 0.000000
1 2.602115 2.102763 0.000000
1 0.327070 2.655939 0.000000
6 -1.886709 -1.148371 0.000000
6 -2.692789 -0.000000 0.000000
6 -1.886709 1.148371 0.000000
1 -3.775137 -0.000000 0.000000
1 -2.229330 2.173795 0.000000
1 -2.229330 -2.173795 0.000000
```

### Refined structure

```
18
refined
6 1.911114 -1.262078 0.000000
6 2.500568 -0.000000 0.000000
6 1.911114 1.262078 0.000000
6 0.557375 1.590580 0.000000
6 -0.541288 0.744897 0.000000
6 -0.541288 -0.744897 0.000000
6 0.557375 -1.590580 0.000000
1 0.326449 -2.652174 0.000000
1 2.598504 -2.100028 0.000000
1 3.585578 -0.000000 0.000000
1 2.598504 2.100028 0.000000
1 0.326449 2.652174 0.000000
6 -1.883953 -1.146571 0.000000
6 -2.688948 -0.000000 0.000000
6 -1.883953 1.146571 0.000000
1 -3.770096 -0.000000 0.000000
1 -2.226138 2.170877 0.000000
1 -2.226138 -2.170877 0.000000
```

### Bond distances

(i, j) | Old dist | New dist | Convergence Err (%) | Original Bond Order

<https://www.skies-village.it/proxima/pcsbonnds/>

PCS/BONDS

|          |          |          |          |       |
|----------|----------|----------|----------|-------|
| (1, 2)   | 1.394959 | 1.392945 | 0.000067 | 1.517 |
| (1, 7)   | 1.395040 | 1.393027 | 0.000029 | 1.517 |
| (1, 9)   | 1.085025 | 1.083819 | 0.000001 | 0.951 |
| (2, 3)   | 1.394959 | 1.392945 | 0.000067 | 1.517 |
| (2, 10)  | 1.086217 | 1.085010 | 0.000027 | 0.947 |
| (3, 4)   | 1.395040 | 1.393027 | 0.000029 | 1.517 |
| (3, 11)  | 1.085025 | 1.083819 | 0.000001 | 0.951 |
| (4, 5)   | 1.388389 | 1.386449 | 0.000081 | 1.551 |
| (4, 12)  | 1.087630 | 1.086420 | 0.000021 | 0.943 |
| (5, 6)   | 1.492546 | 1.489795 | 0.000162 | 1.096 |
| (5, 15)  | 1.403558 | 1.401460 | 0.000102 | 1.474 |
| (6, 7)   | 1.388389 | 1.386449 | 0.000081 | 1.551 |
| (6, 13)  | 1.403558 | 1.401460 | 0.000102 | 1.474 |
| (7, 8)   | 1.087630 | 1.086420 | 0.000021 | 0.943 |
| (13, 14) | 1.403040 | 1.400944 | 0.000103 | 1.477 |
| (13, 18) | 1.081149 | 1.079951 | 0.000002 | 0.964 |
| (14, 15) | 1.403040 | 1.400944 | 0.000103 | 1.477 |
| (14, 16) | 1.082348 | 1.081148 | 0.000013 | 0.960 |
| (15, 17) | 1.081149 | 1.079951 | 0.000002 | 0.964 |

**Parent rotational constants**

Asymmetric top, nearly oblate

| MHz               | A            | B            | C           |
|-------------------|--------------|--------------|-------------|
| Before correcting | 2856.3788184 | 1259.1727793 | 873.9228194 |
| After correcting  | 2865.2631869 | 1262.7460638 | 876.4757032 |

Cartesian Coordinates of all the structures optimized at the rDSD/3F12<sup>-</sup> level.

H2CS 4 atoms  
1 1.669324 0.923620 0.000000  
6 1.093395 -0.000000 0.000000  
16 -0.515622 0.000000 -0.000000  
1 1.669324 -0.923620 -0.000000

CH2F2 5 atoms  
1 -0.000000 -1.155015 0.911123  
6 -0.000000 -0.557145 0.000000  
1 -0.000000 -1.155015 -0.911123  
9 -1.101211 0.237226 0.000000  
9 1.101211 0.237226 -0.000000

Pyrrole 10 atoms  
6 0.982406 0.711702 0.000000  
6 0.982406 -0.711702 0.000000  
6 -0.331306 1.122466 0.000000  
1 1.844094 1.359972 0.000000  
6 -0.331306 -1.122466 0.000000  
1 1.844094 -1.359972 0.000000  
7 -1.118521 0.000000 0.000000  
1 -0.764995 2.108829 0.000000  
1 -2.122136 0.000000 0.000000  
1 -0.764995 -2.108829 0.000000

Furan 9 atoms  
8 -1.131052 0.000000 -0.000000  
6 -0.318717 -1.092247 -0.000000  
6 -0.318717 1.092247 0.000000  
6 0.986442 -0.717189 -0.000000  
6 0.986442 0.717189 0.000000  
1 -0.815186 -2.047362 -0.000000  
1 -0.815186 2.047362 0.000000  
1 1.840004 -1.375105 -0.000000  
1 1.840004 1.375105 0.000000

Thiophene 9 atoms  
16 1.142271 0.000000 0.000000  
6 -0.045367 1.233319 -0.000000  
6 -0.045367 -1.233319 0.000000  
6 -1.311854 0.711532 -0.000000  
6 -1.311854 -0.711532 -0.000000  
1 0.247564 2.271804 -0.000000  
1 0.247564 -2.271804 0.000000  
1 -2.205967 1.319792 -0.000000  
1 -2.205967 -1.319792 -0.000000

Pyridine 11 atoms  
1 -2.494015 0.000000 0.000000  
6 -1.410500 0.000000 0.000000  
6 -0.699065 1.194769 0.000000  
1 -1.206310 2.151475 0.000000

|                           |           |           |           |
|---------------------------|-----------|-----------|-----------|
| 6                         | 0.692105  | 1.140055  | 0.000000  |
| 1                         | 1.275926  | 2.054914  | 0.000000  |
| 7                         | 1.390142  | 0.000000  | 0.000000  |
| 6                         | 0.692105  | -1.140055 | 0.000000  |
| 1                         | 1.275926  | -2.054914 | 0.000000  |
| 6                         | -0.699065 | -1.194769 | 0.000000  |
| 1                         | -1.206310 | -2.151475 | 0.000000  |
| 2-Fluoropyridine 11 atoms |           |           |           |
| 1                         | 1.812293  | 2.101399  | 0.000000  |
| 6                         | 1.236690  | 1.183763  | 0.000000  |
| 6                         | -0.148775 | 1.232038  | 0.000000  |
| 1                         | -0.704004 | 2.159663  | 0.000000  |
| 6                         | -0.814701 | 0.009847  | -0.000000 |
| 9                         | -2.152682 | 0.024394  | -0.000000 |
| 7                         | -0.254329 | -1.173276 | -0.000000 |
| 6                         | 1.087539  | -1.200333 | -0.000000 |
| 1                         | 1.539397  | -2.185942 | -0.000000 |
| 6                         | 1.873803  | -0.057630 | 0.000000  |
| 1                         | 2.952727  | -0.136474 | 0.000000  |
| 3-Fluoropyridine 11 atoms |           |           |           |
| 1                         | -0.773478 | 2.157973  | 0.000000  |
| 6                         | -0.207334 | 1.235405  | 0.000000  |
| 6                         | -0.856033 | 0.014395  | -0.000000 |
| 9                         | -2.198537 | -0.029040 | -0.000000 |
| 6                         | -0.139563 | -1.174483 | -0.000000 |
| 1                         | -0.663495 | -2.124114 | -0.000000 |
| 7                         | 1.194277  | -1.194259 | -0.000000 |
| 6                         | 1.834746  | -0.020983 | 0.000000  |
| 1                         | 2.917973  | -0.068996 | 0.000000  |
| 6                         | 1.183628  | 1.209327  | 0.000000  |
| 1                         | 1.753501  | 2.129830  | 0.000000  |
| 3-Furonitrile 10 atoms    |           |           |           |
| 8                         | 1.786767  | 0.675360  | 0.000000  |
| 6                         | 1.792980  | -0.689207 | -0.000000 |
| 6                         | 0.527857  | -1.173935 | -0.000000 |
| 6                         | -0.328036 | -0.017802 | -0.000000 |
| 6                         | 0.496231  | 1.070208  | 0.000000  |
| 6                         | -1.749721 | 0.004155  | 0.000000  |
| 7                         | -2.911573 | 0.008394  | 0.000000  |
| 1                         | 2.763298  | -1.154381 | -0.000000 |
| 1                         | 0.223033  | -2.206961 | -0.000000 |
| 1                         | 0.307953  | 2.130091  | 0.000000  |
| Azulene 18 atoms          |           |           |           |
| 6                         | 1.913854  | -1.263969 | 0.000000  |
| 6                         | 2.504017  | 0.000000  | 0.000000  |
| 6                         | 1.913854  | 1.263969  | 0.000000  |
| 6                         | 0.558209  | 1.593153  | 0.000000  |
| 6                         | -0.541981 | 0.746273  | 0.000000  |
| 6                         | -0.541981 | -0.746273 | 0.000000  |

|   |           |           |          |
|---|-----------|-----------|----------|
| 6 | 0.558209  | -1.593153 | 0.000000 |
| 1 | 0.327070  | -2.655939 | 0.000000 |
| 1 | 2.602115  | -2.102763 | 0.000000 |
| 1 | 3.590234  | -0.000000 | 0.000000 |
| 1 | 2.602115  | 2.102763  | 0.000000 |
| 1 | 0.327070  | 2.655939  | 0.000000 |
| 6 | -1.886709 | -1.148371 | 0.000000 |
| 6 | -2.692789 | 0.000000  | 0.000000 |
| 6 | -1.886709 | 1.148371  | 0.000000 |
| 1 | -3.775137 | 0.000000  | 0.000000 |
| 1 | -2.229330 | 2.173795  | 0.000000 |
| 1 | -2.229330 | -2.173795 | 0.000000 |

Quinoline 17 atoms

|   |           |           |           |
|---|-----------|-----------|-----------|
| 6 | -2.318629 | 0.717891  | -0.000000 |
| 6 | -2.399293 | -0.695563 | -0.000000 |
| 6 | -1.237182 | -1.422056 | 0.000000  |
| 6 | 0.002486  | -0.738885 | 0.000000  |
| 6 | -0.027074 | 0.682872  | 0.000000  |
| 7 | -1.191920 | 1.395742  | -0.000000 |
| 6 | 1.196445  | 1.397679  | 0.000000  |
| 6 | 2.392992  | 0.724101  | 0.000000  |
| 6 | 2.422604  | -0.691177 | 0.000000  |
| 6 | 1.252191  | -1.408420 | 0.000000  |
| 1 | -3.368357 | -1.179084 | 0.000000  |
| 1 | -1.250775 | -2.506983 | 0.000000  |
| 1 | -3.232327 | 1.305726  | -0.000000 |
| 1 | 1.149795  | 2.479843  | -0.000000 |
| 1 | 3.325110  | 1.276830  | 0.000000  |
| 1 | 3.375596  | -1.206887 | 0.000000  |
| 1 | 1.267100  | -2.493256 | 0.000000  |

Glycine 10 atoms

Conformer I

|   |           |           |           |
|---|-----------|-----------|-----------|
| 6 | -0.768058 | -0.744960 | 0.000000  |
| 7 | -2.003394 | 0.006849  | -0.000000 |
| 1 | -2.035495 | 0.617509  | -0.807580 |
| 6 | 0.500998  | 0.087190  | -0.000000 |
| 8 | 0.552240  | 1.291109  | -0.000000 |
| 8 | 1.601457  | -0.698022 | 0.000000  |
| 1 | 2.366332  | -0.106134 | 0.000000  |
| 1 | -0.730192 | -1.402411 | -0.872200 |
| 1 | -0.730192 | -1.402411 | 0.872200  |
| 1 | -2.035495 | 0.617509  | 0.807580  |

Conformer II

|   |           |           |           |
|---|-----------|-----------|-----------|
| 6 | -0.713544 | -0.816435 | 0.100305  |
| 7 | -1.864313 | 0.072570  | -0.070529 |
| 1 | -2.211014 | 0.053183  | -1.020456 |
| 6 | 0.605346  | -0.048453 | 0.007689  |
| 8 | 1.672407  | -0.597322 | -0.065279 |
| 8 | 0.465896  | 1.282729  | 0.040831  |
| 1 | -0.499012 | 1.437866  | 0.085972  |
| 1 | -0.737843 | -1.262751 | 1.095965  |



|   |           |           |           |
|---|-----------|-----------|-----------|
| 1 | -0.667773 | -1.636619 | -0.618397 |
| 1 | -2.629059 | -0.179822 | 0.539006  |

Cycloserine 13 atoms

Form I

|   |           |           |           |
|---|-----------|-----------|-----------|
| 6 | 0.298849  | 0.804473  | 0.066192  |
| 7 | -1.022624 | 0.934730  | -0.305205 |
| 8 | -1.763154 | -0.207122 | 0.118095  |
| 6 | -0.818084 | -1.269466 | -0.064072 |
| 6 | 0.508260  | -0.678693 | 0.393902  |
| 8 | 1.129690  | 1.685634  | 0.054996  |
| 1 | -1.171435 | -2.111704 | 0.524734  |
| 1 | -0.765474 | -1.543138 | -1.124664 |
| 7 | 1.662420  | -1.308618 | -0.211290 |
| 1 | 0.597107  | -0.750805 | 1.482086  |
| 1 | -1.531945 | 1.781474  | -0.095389 |
| 1 | 1.657497  | -1.152110 | -1.213705 |
| 1 | 2.508895  | -0.876180 | 0.140856  |

Form II

|   |           |           |           |
|---|-----------|-----------|-----------|
| 6 | -0.843767 | -0.291795 | 0.130509  |
| 7 | -0.031817 | -1.366246 | -0.178155 |
| 8 | 1.305383  | -0.926741 | -0.391650 |
| 6 | 1.427602  | 0.137622  | 0.568795  |
| 6 | 0.096116  | 0.863849  | 0.496216  |
| 8 | -2.054784 | -0.292060 | 0.100125  |
| 1 | 1.589848  | -0.292924 | 1.561284  |
| 1 | 2.276561  | 0.745397  | 0.264458  |
| 7 | 0.096395  | 1.898727  | -0.533771 |
| 1 | -0.197481 | 1.305303  | 1.447865  |
| 1 | -0.307976 | -2.012795 | -0.903903 |
| 1 | -0.846968 | 2.248530  | -0.664171 |
| 1 | 0.386219  | 1.501290  | -1.421927 |

Creatinine 15 atoms

ZI

|   |           |           |           |
|---|-----------|-----------|-----------|
| 6 | 1.441029  | -0.052101 | -0.011880 |
| 7 | -0.810398 | -0.624488 | 0.210997  |
| 7 | 0.632698  | 1.052359  | 0.003593  |
| 1 | 0.962457  | 2.002816  | -0.029974 |
| 6 | -0.730072 | 0.746014  | 0.044533  |
| 7 | -1.620592 | 1.651853  | -0.049418 |
| 1 | -2.556438 | 1.262085  | -0.007033 |
| 8 | 2.649067  | -0.079683 | -0.043199 |
| 6 | -2.018254 | -1.348555 | -0.107632 |
| 1 | -2.877407 | -0.862776 | 0.354474  |
| 1 | -2.189839 | -1.420155 | -1.188698 |
| 1 | -1.945540 | -2.354666 | 0.305057  |
| 6 | 0.487582  | -1.239970 | 0.001275  |
| 1 | 0.555943  | -1.761383 | -0.961767 |
| 1 | 0.754519  | -1.938877 | 0.796167  |

EI

|   |           |           |           |
|---|-----------|-----------|-----------|
| 6 | 1.448984  | -0.051336 | -0.011451 |
| 7 | -0.799904 | -0.618945 | 0.183328  |

|                         |           |           |           |
|-------------------------|-----------|-----------|-----------|
| 7                       | 0.639717  | 1.058476  | -0.000334 |
| 1                       | 0.997813  | 1.998662  | -0.008118 |
| 6                       | -0.729455 | 0.745841  | 0.038758  |
| 7                       | -1.737935 | 1.522529  | -0.034474 |
| 1                       | -1.453597 | 2.493253  | -0.112591 |
| 8                       | 2.656790  | -0.071192 | -0.033189 |
| 6                       | -2.023579 | -1.337058 | -0.088085 |
| 1                       | -2.863303 | -0.696329 | 0.169766  |
| 1                       | -2.102658 | -1.616300 | -1.145493 |
| 1                       | -2.057364 | -2.241890 | 0.520338  |
| 6                       | 0.494411  | -1.236341 | -0.005758 |
| 1                       | 0.574148  | -1.765567 | -0.964098 |
| 1                       | 0.753193  | -1.931864 | 0.795571  |
| A1                      |           |           |           |
| 6                       | 1.436770  | 0.002731  | 0.020972  |
| 7                       | -0.781374 | -0.649157 | -0.239025 |
| 7                       | 0.626976  | 1.133486  | 0.042349  |
| 6                       | -0.605869 | 0.695326  | -0.055109 |
| 8                       | 2.644523  | -0.031383 | 0.059916  |
| 6                       | 0.535908  | -1.242280 | -0.069184 |
| 1                       | 0.601563  | -1.818504 | 0.859486  |
| 1                       | 0.819581  | -1.878858 | -0.907708 |
| 6                       | -1.968638 | -1.369395 | 0.173382  |
| 1                       | -2.034816 | -1.466755 | 1.263251  |
| 1                       | -2.868670 | -0.873376 | -0.189018 |
| 1                       | -1.945155 | -2.365091 | -0.268183 |
| 7                       | -1.672882 | 1.525945  | 0.041574  |
| 1                       | -1.442993 | 2.504071  | -0.015318 |
| 1                       | -2.545291 | 1.250266  | -0.372579 |
| Isoamilacetate 23 atoms |           |           |           |
| 6                       | -2.879984 | -1.412198 | -0.135426 |
| 6                       | -2.170973 | -0.089169 | -0.041055 |
| 8                       | -2.663044 | 0.988208  | -0.275078 |
| 8                       | -0.891342 | -0.255895 | 0.345330  |
| 6                       | -0.118969 | 0.956059  | 0.470305  |
| 6                       | 1.287601  | 0.565816  | 0.871158  |
| 6                       | 2.019657  | -0.344877 | -0.118962 |
| 6                       | 2.153998  | 0.295458  | -1.499168 |
| 6                       | 3.394868  | -0.708333 | 0.436852  |
| 1                       | -3.904711 | -1.251686 | -0.459056 |
| 1                       | -2.867341 | -1.906695 | 0.836709  |
| 1                       | -2.360138 | -2.060462 | -0.841924 |
| 1                       | -0.149035 | 1.491074  | -0.479629 |
| 1                       | -0.586183 | 1.592783  | 1.223812  |
| 1                       | 1.251257  | 0.078295  | 1.850669  |
| 1                       | 1.861443  | 1.491801  | 1.000046  |
| 1                       | 1.435867  | -1.265643 | -0.221446 |
| 1                       | 2.683646  | 1.251220  | -1.430991 |
| 1                       | 2.722532  | -0.352600 | -2.170202 |
| 1                       | 1.183867  | 0.479794  | -1.964653 |
| 1                       | 4.013146  | 0.187804  | 0.550018  |
| 1                       | 3.314193  | -1.185520 | 1.416666  |

1 3.921221 -1.394269 -0.230920

Aspirine 21 atoms

6 0.816147 0.483394 0.095362  
6 0.272125 -0.784803 0.344563  
6 1.069970 -1.919825 0.315036  
6 2.426295 -1.810221 0.031260  
6 2.984695 -0.561263 -0.227568  
6 2.183543 0.571906 -0.194629  
6 -0.014614 1.713537 0.157677  
8 -1.052149 -0.957517 0.697346  
8 -1.185717 1.773170 0.452315  
8 0.694546 2.825489 -0.147992  
6 -1.989419 -0.744217 -0.285396  
1 0.069227 3.559540 -0.079755  
8 -1.702114 -0.597266 -1.440092  
6 -3.361578 -0.734030 0.311090  
1 0.610135 -2.879265 0.514640  
1 3.043239 -2.700384 0.008514  
1 4.039605 -0.469622 -0.453068  
1 2.611100 1.544996 -0.391204  
1 -3.479601 -1.554962 1.017576  
1 -4.102909 -0.796272 -0.480961  
1 -3.478057 0.204315 0.855967

Vitamin C 20 atoms

Conformer I

6 0.361557 -0.374769 -0.480370  
8 -0.659862 -1.385265 -0.421282  
6 -1.842013 -0.793486 -0.061274  
6 -1.635216 0.646180 0.068822  
6 -0.349283 0.920076 -0.204278  
8 -2.870133 -1.400843 0.094757  
8 -2.652728 1.475705 0.374709  
8 0.249621 2.116363 -0.272016  
6 1.450598 -0.773456 0.521109  
6 2.434598 0.343501 0.810708  
8 2.812314 1.060933 -0.368028  
8 2.197916 -1.864537 0.002548  
1 0.785399 -0.389656 -1.488531  
1 -3.440328 0.922962 0.469817  
1 1.179945 1.987437 -0.527794  
1 0.955511 -1.051598 1.460020  
1 1.589377 -2.587842 -0.180791  
1 3.283106 0.459146 -0.952921  
1 1.978121 1.080273 1.470569  
1 3.311794 -0.077657 1.306832

Conformer II

6 0.209039 -0.011489 -1.031064  
8 -0.621413 -1.173079 -0.957605  
6 -1.728824 -0.873287 -0.206881  
6 -1.629945 0.504507 0.267960  
6 -0.479122 1.024723 -0.184674

|               |           |           |           |
|---------------|-----------|-----------|-----------|
| 8             | -2.613271 | -1.659755 | 0.015698  |
| 8             | -2.585939 | 1.047668  | 1.049464  |
| 8             | 0.035890  | 2.245000  | 0.018098  |
| 6             | 1.624487  | -0.338738 | -0.570297 |
| 6             | 1.705858  | -0.804530 | 0.869284  |
| 8             | 3.101093  | -0.940872 | 1.135981  |
| 8             | 2.349943  | 0.880973  | -0.739797 |
| 1             | 0.258208  | 0.314408  | -2.075013 |
| 1             | -3.267589 | 0.371070  | 1.160693  |
| 1             | 0.965576  | 2.213037  | -0.260538 |
| 1             | 2.043776  | -1.116187 | -1.218149 |
| 1             | 3.190813  | 0.765862  | -0.281124 |
| 1             | 3.225109  | -1.139192 | 2.066605  |
| 1             | 1.253655  | -0.059971 | 1.532458  |
| 1             | 1.180730  | -1.756995 | 0.981466  |
| Conformer III |           |           |           |
| 6             | -0.353523 | -0.455218 | -0.795416 |
| 8             | -0.187153 | 0.973250  | -0.674366 |
| 6             | 1.050089  | 1.243861  | -0.151022 |
| 6             | 1.756946  | -0.015629 | 0.041818  |
| 6             | 0.953230  | -1.016293 | -0.336282 |
| 8             | 1.443537  | 2.355889  | 0.088508  |
| 8             | 3.012417  | -0.082494 | 0.539732  |
| 8             | 1.127952  | -2.347772 | -0.340571 |
| 6             | -1.551292 | -0.920408 | 0.039729  |
| 6             | -2.837349 | -0.191994 | -0.356439 |
| 8             | -2.889482 | 1.108773  | 0.209467  |
| 8             | -1.303870 | -0.765066 | 1.417476  |
| 1             | -0.538958 | -0.679427 | -1.851161 |
| 1             | 3.293491  | 0.822550  | 0.727825  |
| 1             | 1.987361  | -2.555719 | 0.044222  |
| 1             | -1.669683 | -1.990513 | -0.160708 |
| 1             | -1.679419 | 0.090272  | 1.663781  |
| 1             | -2.169332 | 1.625754  | -0.169356 |
| 1             | -2.939181 | -0.162787 | -1.447360 |
| 1             | -3.691815 | -0.728894 | 0.055350  |

Uracil 12 atoms

|   |           |           |          |
|---|-----------|-----------|----------|
| 6 | 1.284614  | 0.312086  | 0.000000 |
| 7 | 0.034976  | 0.949478  | 0.000000 |
| 6 | -1.216052 | 0.368704  | 0.000000 |
| 7 | -1.174808 | -1.015698 | 0.000000 |
| 6 | -0.007792 | -1.738244 | 0.000000 |
| 6 | 1.199306  | -1.142530 | 0.000000 |
| 1 | -2.071601 | -1.472056 | 0.000000 |
| 8 | -2.253526 | 0.996013  | 0.000000 |
| 1 | 0.046777  | 1.959872  | 0.000000 |
| 8 | 2.308378  | 0.966836  | 0.000000 |
| 1 | -0.127684 | -2.813517 | 0.000000 |
| 1 | 2.115688  | -1.711219 | 0.000000 |

2-Thiouracil 12 atoms

|   |           |           |          |
|---|-----------|-----------|----------|
| 7 | -0.203123 | -0.840560 | 0.000000 |
|---|-----------|-----------|----------|

|    |           |           |           |
|----|-----------|-----------|-----------|
| 6  | 0.853886  | 0.023739  | -0.000000 |
| 7  | 0.482671  | 1.343113  | -0.000000 |
| 6  | -0.821831 | 1.767434  | -0.000000 |
| 6  | -1.849858 | 0.897442  | -0.000000 |
| 6  | -1.576225 | -0.531295 | 0.000000  |
| 1  | 0.029895  | -1.824485 | 0.000000  |
| 16 | 2.433402  | -0.452163 | 0.000000  |
| 1  | 1.243623  | 2.002945  | -0.000000 |
| 1  | -0.959315 | 2.840475  | -0.000000 |
| 1  | -2.877078 | 1.226543  | -0.000000 |
| 8  | -2.401025 | -1.422156 | 0.000000  |

Adenine 15 atoms

|   |           |           |           |
|---|-----------|-----------|-----------|
| 6 | -1.205420 | 0.658807  | 0.001521  |
| 7 | -1.960115 | -0.446863 | 0.008249  |
| 6 | -1.344580 | -1.640655 | 0.003494  |
| 7 | -0.039091 | -1.906864 | -0.003885 |
| 6 | 0.681750  | -0.780285 | -0.003989 |
| 6 | 0.193216  | 0.523057  | -0.000919 |
| 7 | 1.223441  | 1.448968  | 0.005143  |
| 6 | 2.306667  | 0.710960  | 0.003696  |
| 7 | 2.048144  | -0.639212 | -0.002473 |
| 1 | 2.719412  | -1.388386 | -0.004172 |
| 7 | -1.811445 | 1.867317  | -0.029754 |
| 1 | -1.259166 | 2.691264  | 0.127990  |
| 1 | -2.802419 | 1.900989  | 0.131467  |
| 1 | -2.004979 | -2.500805 | 0.007858  |
| 1 | 3.316393  | 1.092447  | 0.007252  |

Thymine 15 atoms

|   |           |           |           |
|---|-----------|-----------|-----------|
| 6 | -0.749894 | -0.831627 | 0.000000  |
| 7 | 0.636961  | -1.011959 | 0.000000  |
| 6 | 1.619268  | -0.042395 | 0.000000  |
| 7 | 1.108431  | 1.239721  | 0.000000  |
| 6 | -0.239179 | 1.524483  | 0.000000  |
| 6 | -1.186003 | 0.565450  | 0.000000  |
| 1 | 1.793851  | 1.976113  | 0.000000  |
| 8 | 2.808206  | -0.285808 | 0.000000  |
| 1 | 0.965435  | -1.967353 | 0.000000  |
| 8 | -1.496246 | -1.793478 | 0.000000  |
| 1 | -0.486848 | 2.578436  | 0.000000  |
| 6 | -2.655540 | 0.844137  | 0.000000  |
| 1 | -3.130839 | 0.400664  | 0.876877  |
| 1 | -2.846631 | 1.918004  | 0.000000  |
| 1 | -3.130839 | 0.400664  | -0.876877 |

Cytosine 13 atoms

EA

|   |           |           |           |
|---|-----------|-----------|-----------|
| 7 | -0.072320 | -0.985054 | -0.005931 |
| 6 | 1.069531  | -0.307915 | -0.000084 |
| 7 | 1.247982  | 1.010842  | 0.001600  |
| 6 | 0.113202  | 1.728021  | -0.000783 |
| 6 | -1.141130 | 1.159679  | -0.002004 |

|     |           |           |           |
|-----|-----------|-----------|-----------|
| 6   | -1.185667 | -0.247580 | -0.003516 |
| 8   | 2.176292  | -1.067341 | 0.000327  |
| 1   | 2.919491  | -0.451343 | 0.002477  |
| 1   | 0.231631  | 2.806435  | -0.000780 |
| 1   | -2.039711 | 1.761387  | 0.003823  |
| 7   | -2.363616 | -0.930686 | 0.035936  |
| 1   | -3.210484 | -0.456004 | -0.219233 |
| 1   | -2.312238 | -1.917188 | -0.154552 |
| EAc |           |           |           |
| 7   | -0.056705 | -0.970551 | -0.006664 |
| 6   | 1.084978  | -0.279393 | -0.000307 |
| 7   | 1.249360  | 1.035013  | 0.000923  |
| 6   | 0.103169  | 1.731782  | -0.000943 |
| 6   | -1.148741 | 1.152933  | -0.001252 |
| 6   | -1.182852 | -0.251730 | -0.003630 |
| 8   | 2.214852  | -1.004400 | 0.001076  |
| 1   | 1.943694  | -1.930224 | 0.003748  |
| 1   | 0.207132  | 2.811951  | -0.001191 |
| 1   | -2.052323 | 1.747133  | 0.005301  |
| 7   | -2.354210 | -0.949669 | 0.037900  |
| 1   | -3.201658 | -0.480939 | -0.227564 |
| 1   | -2.294255 | -1.931830 | -0.171188 |
| KA  |           |           |           |
| 7   | -0.078153 | -1.021898 | -0.007797 |
| 6   | 1.162980  | -0.435742 | 0.000144  |
| 7   | 1.189456  | 0.978788  | 0.001013  |
| 6   | 0.075602  | 1.745762  | -0.000459 |
| 6   | -1.146405 | 1.162871  | -0.001493 |
| 6   | -1.157926 | -0.274770 | -0.003988 |
| 8   | 2.219195  | -1.036845 | 0.001531  |
| 1   | 2.108847  | 1.390779  | 0.002658  |
| 1   | 0.220501  | 2.818340  | 0.001231  |
| 1   | -2.053492 | 1.748415  | 0.006904  |
| 7   | -2.354243 | -0.917082 | 0.030356  |
| 1   | -3.198719 | -0.420226 | -0.184526 |
| 1   | -2.337836 | -1.913240 | -0.109058 |
| KI  |           |           |           |
| 7   | -0.047844 | -0.952003 | 0.000000  |
| 6   | 1.197538  | -0.374345 | 0.000000  |
| 7   | 1.167512  | 1.011885  | -0.000000 |
| 6   | 0.000712  | 1.739369  | -0.000000 |
| 6   | -1.204221 | 1.142841  | -0.000000 |
| 6   | -1.290952 | -0.310696 | -0.000000 |
| 8   | 2.235531  | -1.003688 | 0.000000  |
| 1   | 2.066867  | 1.461764  | -0.000000 |
| 1   | 0.119952  | 2.814523  | -0.000000 |
| 1   | -2.111965 | 1.727271  | -0.000000 |
| 7   | -2.334375 | -1.052842 | -0.000000 |
| 1   | -3.171872 | -0.477402 | -0.000000 |
| 1   | -0.062679 | -1.961678 | 0.000000  |
| KIc |           |           |           |
| 7   | -0.038678 | -0.957464 | 0.000000  |
| 6   | 1.208083  | -0.366506 | 0.000000  |

|   |           |           |           |
|---|-----------|-----------|-----------|
| 7 | 1.168739  | 1.012893  | -0.000000 |
| 6 | -0.007757 | 1.734546  | -0.000000 |
| 6 | -1.206713 | 1.130660  | -0.000000 |
| 6 | -1.291013 | -0.321052 | -0.000000 |
| 8 | 2.244060  | -1.000102 | 0.000000  |
| 1 | 2.064378  | 1.470034  | -0.000000 |
| 1 | 0.106078  | 2.809864  | -0.000000 |
| 1 | -2.126922 | 1.692995  | -0.000000 |
| 7 | -2.418154 | -0.927915 | -0.000000 |
| 1 | -2.303251 | -1.940703 | 0.000000  |
| 1 | -0.010002 | -1.966096 | 0.000000  |

Guanine 16 atom

KA17 (I)

|   |           |           |           |
|---|-----------|-----------|-----------|
| 6 | -1.686287 | -0.572285 | 0.007409  |
| 7 | -0.735486 | -1.455361 | 0.016198  |
| 6 | 0.521220  | -0.916073 | 0.002602  |
| 6 | 0.789164  | 0.445450  | 0.010178  |
| 6 | -0.237689 | 1.433680  | 0.004622  |
| 7 | -1.489574 | 0.789940  | 0.002665  |
| 7 | 2.157365  | 0.557746  | 0.002798  |
| 7 | 1.690830  | -1.630740 | -0.006218 |
| 6 | 2.639256  | -0.714039 | -0.006816 |
| 8 | -0.143645 | 2.651152  | -0.006296 |
| 7 | -3.002852 | -0.977490 | -0.057483 |
| 1 | -3.098243 | -1.969038 | 0.101227  |
| 1 | -3.668447 | -0.425209 | 0.460142  |
| 1 | 3.698290  | -0.921269 | -0.013705 |
| 1 | -2.283670 | 1.408736  | -0.079668 |
| 1 | 2.682834  | 1.415899  | 0.001795  |

KA19 (II)

|   |           |           |           |
|---|-----------|-----------|-----------|
| 6 | -1.694293 | -0.570665 | 0.006620  |
| 7 | -0.737344 | -1.457438 | 0.014927  |
| 6 | 0.494134  | -0.881330 | 0.002088  |
| 6 | 0.835213  | 0.462866  | 0.006387  |
| 6 | -0.218020 | 1.441259  | 0.003908  |
| 7 | -1.482136 | 0.777790  | 0.003438  |
| 7 | 2.206993  | 0.623381  | 0.001102  |
| 7 | 1.683671  | -1.551458 | -0.004045 |
| 6 | 2.677146  | -0.596391 | -0.004932 |
| 8 | -0.180891 | 2.653668  | -0.004209 |
| 7 | -3.003306 | -0.984245 | -0.054801 |
| 1 | -3.111575 | -1.969239 | 0.128405  |
| 1 | -3.688432 | -0.404500 | 0.402024  |
| 1 | 3.722148  | -0.864880 | -0.009981 |
| 1 | -2.270308 | 1.406056  | -0.064754 |
| 1 | 1.792973  | -2.551622 | -0.009295 |

EA9 (III)

|   |           |           |           |
|---|-----------|-----------|-----------|
| 6 | -1.680812 | -0.558482 | 0.003176  |
| 7 | -0.709874 | -1.473463 | 0.010230  |
| 6 | 0.499260  | -0.910884 | 0.002876  |
| 6 | 0.802277  | 0.453772  | -0.004352 |
| 6 | -0.316203 | 1.293684  | 0.000692  |

|             |           |           |           |
|-------------|-----------|-----------|-----------|
| 7           | -1.538621 | 0.787263  | 0.005097  |
| 7           | 2.173283  | 0.662266  | -0.007613 |
| 7           | 1.715960  | -1.537619 | 0.004704  |
| 6           | 2.674333  | -0.543409 | -0.002822 |
| 8           | -0.178930 | 2.621928  | 0.004404  |
| 7           | -2.968738 | -1.014501 | -0.047689 |
| 1           | -3.107299 | -1.977537 | 0.204332  |
| 1           | -3.683356 | -0.360020 | 0.217736  |
| 1           | 3.727949  | -0.777912 | -0.004371 |
| 1           | -1.074297 | 2.987373  | 0.002539  |
| 1           | 1.866427  | -2.532094 | 0.005071  |
| EAc9 (III') |           |           |           |
| 6           | -1.697514 | -0.518212 | 0.002985  |
| 7           | -0.750882 | -1.464717 | 0.010465  |
| 6           | 0.470773  | -0.933525 | 0.002415  |
| 6           | 0.789443  | 0.421274  | -0.006175 |
| 6           | -0.302291 | 1.296683  | 0.000127  |
| 7           | -1.532032 | 0.826458  | 0.004974  |
| 7           | 2.159789  | 0.623945  | -0.008469 |
| 7           | 1.685561  | -1.570812 | 0.005341  |
| 6           | 2.653620  | -0.587597 | -0.002379 |
| 8           | -0.149836 | 2.627021  | 0.005897  |
| 7           | -2.993854 | -0.942200 | -0.045186 |
| 1           | -3.163670 | -1.902351 | 0.196671  |
| 1           | -3.694775 | -0.263966 | 0.195614  |
| 1           | 3.704906  | -0.831367 | -0.003131 |
| 1           | 1.831418  | -2.566167 | 0.007263  |
| 1           | 0.798714  | 2.813248  | 0.002806  |

Ac3C 14 Atoms

Conformer I

|   |           |           |           |
|---|-----------|-----------|-----------|
| 6 | 0.544662  | 0.232349  | 0.000000  |
| 7 | 1.008550  | 1.588555  | 0.000000  |
| 1 | 0.645112  | 2.077239  | 0.810520  |
| 6 | -0.930612 | 0.023536  | -0.000000 |
| 8 | -1.746475 | 0.914634  | -0.000000 |
| 8 | -1.288409 | -1.283850 | -0.000000 |
| 1 | -2.254846 | -1.295790 | -0.000000 |
| 6 | 1.402632  | -0.767953 | 0.746898  |
| 6 | 1.402632  | -0.767953 | -0.746898 |
| 1 | 0.899306  | -1.578224 | 1.254102  |
| 1 | 2.256153  | -0.336735 | 1.250652  |
| 1 | 0.899306  | -1.578224 | -1.254102 |
| 1 | 2.256153  | -0.336735 | -1.250652 |
| 1 | 0.645112  | 2.077239  | -0.810520 |

Conformer II

|   |           |           |           |
|---|-----------|-----------|-----------|
| 6 | 0.525765  | 0.228899  | 0.000000  |
| 7 | 0.690989  | 1.664127  | 0.000000  |
| 1 | 1.172691  | 1.999719  | 0.822265  |
| 6 | -0.911761 | -0.224776 | -0.000000 |
| 8 | -1.242786 | -1.383427 | 0.000000  |
| 8 | -1.796443 | 0.781405  | 0.000000  |
| 1 | -1.257670 | 1.596154  | 0.000000  |



|               |           |           |           |
|---------------|-----------|-----------|-----------|
| 6             | 1.487448  | -0.665055 | 0.747431  |
| 6             | 1.487448  | -0.665055 | -0.747431 |
| 1             | 1.056502  | -1.519700 | 1.249634  |
| 1             | 2.303806  | -0.167664 | 1.255120  |
| 1             | 1.056502  | -1.519700 | -1.249634 |
| 1             | 2.303806  | -0.167664 | -1.255120 |
| 1             | 1.172691  | 1.999719  | -0.822265 |
| Conformer III |           |           |           |
| 6             | 0.533472  | 0.238660  | -0.000000 |
| 7             | 0.869772  | 1.632996  | -0.000000 |
| 1             | 0.482139  | 2.094298  | 0.814088  |
| 6             | -0.891874 | -0.202522 | 0.000000  |
| 8             | -1.267651 | -1.351184 | 0.000000  |
| 8             | -1.756077 | 0.840740  | -0.000000 |
| 1             | -2.640356 | 0.448930  | 0.000000  |
| 6             | 1.478053  | -0.681763 | 0.745743  |
| 6             | 1.478053  | -0.681763 | -0.745743 |
| 1             | 1.034110  | -1.529963 | 1.247413  |
| 1             | 2.290637  | -0.180463 | 1.252230  |
| 1             | 1.034110  | -1.529963 | -1.247413 |
| 1             | 2.290637  | -0.180463 | -1.252230 |
| 1             | 0.482139  | 2.094298  | -0.814088 |

Aib 16 Atoms

Conformer I

|   |           |           |           |
|---|-----------|-----------|-----------|
| 6 | -0.646141 | 0.003632  | 0.000000  |
| 7 | -1.294731 | -1.299159 | -0.000000 |
| 1 | -0.989882 | -1.832684 | 0.807288  |
| 6 | 0.880532  | -0.127681 | -0.000000 |
| 8 | 1.492097  | -1.167725 | -0.000000 |
| 8 | 1.503310  | 1.074188  | 0.000000  |
| 1 | 2.452674  | 0.888840  | -0.000000 |
| 6 | -1.077605 | 0.761717  | 1.257699  |
| 6 | -1.077605 | 0.761717  | -1.257699 |
| 1 | -0.637593 | 1.758022  | 1.286961  |
| 1 | -2.164989 | 0.844383  | 1.258735  |
| 1 | -2.164989 | 0.844383  | -1.258735 |
| 1 | -0.637593 | 1.758022  | -1.286961 |
| 1 | -0.989882 | -1.832684 | -0.807288 |
| 1 | -0.773360 | 0.222471  | 2.158814  |
| 1 | -0.773360 | 0.222471  | -2.158814 |

Conformer II

|   |           |           |           |
|---|-----------|-----------|-----------|
| 6 | -0.635028 | -0.013951 | 0.011193  |
| 7 | -1.018466 | 1.362030  | 0.374497  |
| 1 | -1.867222 | 1.638879  | -0.102213 |
| 6 | 0.905933  | -0.108175 | 0.024946  |
| 8 | 1.496560  | -1.156703 | -0.011983 |
| 8 | 1.532007  | 1.075064  | 0.035359  |
| 1 | 0.812159  | 1.737093  | 0.089777  |
| 6 | -1.076707 | -0.280366 | -1.428864 |
| 6 | -1.212640 | -1.061792 | 0.958505  |
| 1 | -0.709641 | -1.252056 | -1.757585 |
| 1 | -2.168384 | -0.279503 | -1.488481 |

|   |           |           |           |
|---|-----------|-----------|-----------|
| 1 | -2.303465 | -1.051657 | 0.900390  |
| 1 | -0.848046 | -2.054162 | 0.696412  |
| 1 | -1.193179 | 1.438334  | 1.370046  |
| 1 | -0.687402 | 0.485783  | -2.103050 |
| 1 | -0.916223 | -0.856573 | 1.990512  |

Conformer III

|   |           |           |           |
|---|-----------|-----------|-----------|
| 6 | 0.646395  | 0.000577  | 0.003112  |
| 7 | 1.102061  | 0.769722  | -1.158949 |
| 1 | 0.638542  | 1.670689  | -1.189748 |
| 6 | -0.877583 | -0.145745 | 0.009791  |
| 8 | -1.497793 | -1.179946 | 0.034381  |
| 8 | -1.496555 | 1.061808  | -0.028200 |
| 1 | -2.446017 | 0.880179  | -0.028679 |
| 6 | 1.071493  | 0.747070  | 1.268498  |
| 6 | 1.282245  | -1.381113 | -0.047269 |
| 1 | 0.736286  | 0.217850  | 2.163078  |
| 1 | 2.159627  | 0.818471  | 1.284002  |
| 1 | 2.366762  | -1.269475 | -0.049805 |
| 1 | 0.979802  | -1.979758 | 0.811540  |
| 1 | 0.869454  | 0.283141  | -2.018024 |
| 1 | 0.653391  | 1.754505  | 1.286246  |
| 1 | 0.979389  | -1.917504 | -0.948475 |

Proline 17 Atoms

IIE-

|   |           |           |           |
|---|-----------|-----------|-----------|
| 7 | 0.833190  | -1.005463 | 0.596960  |
| 6 | -0.034580 | 0.179585  | 0.769422  |
| 6 | 0.750955  | 1.359540  | 0.179235  |
| 6 | 1.657457  | 0.672026  | -0.842447 |
| 6 | 2.070124  | -0.596795 | -0.103972 |
| 6 | -1.363696 | -0.020591 | 0.026167  |
| 8 | -2.219780 | 0.825652  | -0.011480 |
| 8 | -1.478834 | -1.210859 | -0.570357 |
| 1 | 1.031229  | -1.456431 | 1.478790  |
| 1 | -0.292547 | 0.348352  | 1.816897  |
| 1 | -0.625419 | -1.657281 | -0.366674 |
| 1 | 1.356293  | 1.826534  | 0.960064  |
| 1 | 0.088544  | 2.114201  | -0.241604 |
| 1 | 2.512513  | 1.278930  | -1.139738 |
| 1 | 1.089990  | 0.416588  | -1.741564 |
| 1 | 2.875540  | -0.372782 | 0.604904  |
| 1 | 2.410800  | -1.391043 | -0.769486 |

IIE+

|   |           |           |           |
|---|-----------|-----------|-----------|
| 6 | 1.908154  | -0.797418 | -0.343434 |
| 7 | 0.737806  | -1.048239 | 0.522388  |
| 6 | -0.026047 | 0.216741  | 0.614953  |
| 6 | 0.784098  | 1.282100  | -0.160251 |
| 6 | 2.195716  | 0.695214  | -0.199466 |
| 6 | -1.430437 | 0.055839  | 0.033972  |
| 8 | -1.696074 | -1.176615 | -0.414543 |
| 8 | -2.218863 | 0.964029  | -0.022152 |
| 1 | 1.047587  | -1.331363 | 1.442053  |
| 1 | -0.152217 | 0.512487  | 1.658660  |

|     |           |           |           |
|-----|-----------|-----------|-----------|
| 1   | 0.388482  | 1.383885  | -1.173569 |
| 1   | 0.723311  | 2.259674  | 0.314571  |
| 1   | 2.800962  | 1.097740  | -1.013149 |
| 1   | 2.717628  | 0.884795  | 0.743246  |
| 1   | 1.641580  | -1.030361 | -1.378562 |
| 1   | 2.735161  | -1.446746 | -0.055749 |
| 1   | -0.879026 | -1.686000 | -0.219406 |
| IE- |           |           |           |
| 7   | -0.902296 | -0.967653 | -0.726092 |
| 6   | 0.023941  | 0.167403  | -0.720616 |
| 6   | -0.714731 | 1.337355  | -0.016682 |
| 6   | -1.741842 | 0.617042  | 0.856045  |
| 6   | -2.141467 | -0.546845 | -0.049379 |
| 6   | 1.300716  | -0.176417 | 0.015928  |
| 8   | 1.472005  | -1.146707 | 0.713727  |
| 8   | 2.258021  | 0.753123  | -0.188833 |
| 1   | 0.311374  | 0.458681  | -1.734418 |
| 1   | 3.030189  | 0.472657  | 0.321557  |
| 1   | -1.221663 | 1.942004  | -0.771852 |
| 1   | -0.035117 | 1.989065  | 0.532410  |
| 1   | -2.578991 | 1.256807  | 1.140372  |
| 1   | -1.269361 | 0.238300  | 1.766703  |
| 1   | -2.867529 | -0.208121 | -0.795615 |
| 1   | -2.581876 | -1.390088 | 0.483746  |
| 1   | -0.472821 | -1.720112 | -0.200390 |
| IE+ |           |           |           |
| 6   | 1.910286  | -0.791364 | -0.319725 |
| 7   | 0.876798  | -0.955180 | 0.708533  |
| 6   | -0.016985 | 0.198347  | 0.638102  |
| 6   | 0.739793  | 1.269425  | -0.192563 |
| 6   | 2.162075  | 0.709343  | -0.284893 |
| 6   | -1.349964 | -0.130991 | 0.001914  |
| 8   | -2.202212 | 0.915249  | 0.072486  |
| 8   | -1.646461 | -1.182061 | -0.511822 |
| 1   | -0.234004 | 0.577843  | 1.641541  |
| 1   | 0.305954  | 1.344128  | -1.192864 |
| 1   | 0.682182  | 2.255381  | 0.266185  |
| 1   | 2.701468  | 1.074896  | -1.159385 |
| 1   | 2.733381  | 0.964382  | 0.610364  |
| 1   | 1.566234  | -1.090330 | -1.320719 |
| 1   | 2.791889  | -1.382936 | -0.068072 |
| 1   | -3.022631 | 0.634409  | -0.355919 |
| 1   | 0.352743  | -1.811875 | 0.578188  |

Fluorothreonine 17 atoms

|         |           |           |           |
|---------|-----------|-----------|-----------|
| I'gg-g- |           |           |           |
| 9       | -2.538320 | 0.752291  | -0.821330 |
| 6       | -2.190131 | -0.079927 | 0.242850  |
| 6       | -0.740385 | 0.156021  | 0.633215  |
| 6       | 0.205286  | -0.118658 | -0.548050 |
| 6       | 1.622358  | 0.287052  | -0.192512 |
| 1       | -2.844947 | 0.146786  | 1.084251  |
| 1       | -2.342376 | -1.114712 | -0.071662 |

|              |           |           |           |
|--------------|-----------|-----------|-----------|
| 1            | -0.617921 | 1.185501  | 0.970468  |
| 8            | -0.417354 | -0.691305 | 1.715731  |
| 1            | -0.251696 | -1.558527 | 1.316768  |
| 1            | -0.102566 | 0.514059  | -1.387911 |
| 7            | 0.180087  | -1.544209 | -0.855328 |
| 1            | 1.122899  | -1.870098 | -1.034620 |
| 1            | -0.385492 | -1.737020 | -1.669958 |
| 8            | 2.584717  | -0.435625 | -0.270060 |
| 8            | 1.693789  | 1.571063  | 0.201333  |
| 1            | 2.621956  | 1.748645  | 0.407131  |
| II t g - g - |           |           |           |
| 9            | 1.800798  | 1.288504  | 0.795299  |
| 6            | 1.607549  | -0.100280 | 0.759360  |
| 6            | 1.013226  | -0.521313 | -0.578676 |
| 6            | -0.352959 | 0.117504  | -0.890921 |
| 6            | -1.371783 | -0.215473 | 0.207086  |
| 1            | 2.577523  | -0.577618 | 0.892862  |
| 1            | 0.948436  | -0.364434 | 1.588100  |
| 1            | 1.703039  | -0.227291 | -1.374819 |
| 8            | 0.932469  | -1.930584 | -0.601672 |
| 1            | 0.167782  | -2.166551 | -0.053523 |
| 1            | -0.725151 | -0.387181 | -1.787315 |
| 7            | -0.348137 | 1.560151  | -1.136445 |
| 1            | 0.394310  | 2.013917  | -0.618315 |
| 1            | -0.223535 | 1.768637  | -2.117063 |
| 8            | -1.425405 | -1.302190 | 0.739765  |
| 8            | -2.198896 | 0.776287  | 0.511292  |
| 1            | -1.899513 | 1.527720  | -0.047160 |
| II g g g -   |           |           |           |
| 9            | 2.631116  | 0.647173  | -0.087282 |
| 6            | 2.108725  | -0.536220 | -0.605405 |
| 6            | 0.687139  | -0.779319 | -0.155732 |
| 6            | -0.273120 | 0.373752  | -0.464916 |
| 6            | -1.716257 | -0.105458 | -0.227311 |
| 1            | 2.148204  | -0.461769 | -1.694817 |
| 1            | 2.746833  | -1.352124 | -0.264711 |
| 1            | 0.338705  | -1.657197 | -0.710856 |
| 8            | 0.689472  | -1.045045 | 1.241427  |
| 1            | -0.096419 | -1.563923 | 1.440213  |
| 1            | -0.213692 | 0.613523  | -1.532398 |
| 7            | -0.061704 | 1.602081  | 0.299692  |
| 1            | 0.682582  | 2.151210  | -0.108702 |
| 1            | 0.248481  | 1.350806  | 1.234062  |
| 8            | -2.070417 | -1.245200 | -0.403170 |
| 8            | -2.540687 | 0.859370  | 0.176426  |
| 1            | -1.959812 | 1.638210  | 0.319741  |
| I' g g - g   |           |           |           |
| 9            | 2.596473  | 0.492016  | -0.495533 |
| 6            | 2.041542  | -0.787989 | -0.423346 |
| 6            | 0.663483  | -0.759388 | 0.209622  |
| 6            | -0.248571 | 0.299467  | -0.452340 |
| 6            | -1.715526 | -0.001697 | -0.204462 |
| 1            | 1.987709  | -1.174802 | -1.444594 |

|                    |           |           |           |
|--------------------|-----------|-----------|-----------|
| 1                  | 2.711629  | -1.403768 | 0.177302  |
| 1                  | 0.235392  | -1.752565 | 0.050414  |
| 8                  | 0.715000  | -0.532555 | 1.597249  |
| 1                  | 0.656953  | 0.432177  | 1.693419  |
| 1                  | -0.115006 | 0.239608  | -1.541939 |
| 7                  | 0.049514  | 1.606214  | 0.109528  |
| 1                  | -0.768613 | 2.200636  | 0.080874  |
| 1                  | 0.824342  | 2.045292  | -0.366563 |
| 8                  | -2.523037 | 0.794212  | 0.203010  |
| 8                  | -2.035808 | -1.265731 | -0.545336 |
| 1                  | -2.983683 | -1.364592 | -0.380820 |
| Ig <sup>tt</sup>   |           |           |           |
| 9                  | -3.080182 | 0.454049  | -0.048341 |
| 6                  | -2.029971 | -0.333280 | -0.533971 |
| 6                  | -0.734371 | 0.294179  | -0.067661 |
| 6                  | 0.478345  | -0.486774 | -0.568980 |
| 6                  | 1.763171  | 0.213383  | -0.129443 |
| 1                  | -2.151544 | -1.338220 | -0.135625 |
| 1                  | -2.096523 | -0.344957 | -1.623713 |
| 1                  | -0.681729 | 1.317946  | -0.452473 |
| 8                  | -0.656971 | 0.299012  | 1.351119  |
| 1                  | -1.455106 | 0.717124  | 1.688151  |
| 1                  | 0.466959  | -0.444648 | -1.663860 |
| 7                  | 0.399375  | -1.869283 | -0.143182 |
| 1                  | 0.373988  | -1.892124 | 0.871030  |
| 1                  | 1.245328  | -2.357704 | -0.411416 |
| 8                  | 2.656843  | -0.306295 | 0.486116  |
| 8                  | 1.805466  | 1.495210  | -0.554718 |
| 1                  | 2.645481  | 1.862140  | -0.246341 |
| IIg <sup>-tt</sup> |           |           |           |
| 9                  | -2.740496 | -0.856704 | -0.387571 |
| 6                  | -1.491056 | -0.878085 | 0.242369  |
| 6                  | -0.753422 | 0.370688  | -0.196768 |
| 6                  | 0.597954  | 0.540872  | 0.501097  |
| 6                  | 1.528853  | -0.605400 | 0.086317  |
| 1                  | -1.666390 | -0.868578 | 1.319287  |
| 1                  | -0.974837 | -1.789602 | -0.049368 |
| 1                  | -0.593919 | 0.327729  | -1.283090 |
| 8                  | -1.514065 | 1.526191  | 0.130393  |
| 1                  | -2.400521 | 1.395739  | -0.221840 |
| 1                  | 0.438551  | 0.458719  | 1.580904  |
| 7                  | 1.180970  | 1.820263  | 0.094621  |
| 1                  | 1.786107  | 2.183807  | 0.820843  |
| 1                  | 0.441538  | 2.498479  | -0.048181 |
| 8                  | 1.424861  | -1.722450 | 0.524950  |
| 8                  | 2.440419  | -0.259934 | -0.825418 |
| 1                  | 2.307077  | 0.701914  | -0.965188 |
| IIggg              |           |           |           |
| 9                  | 2.631116  | 0.647173  | -0.087282 |
| 6                  | 2.108725  | -0.536220 | -0.605405 |
| 6                  | 0.687139  | -0.779319 | -0.155732 |
| 6                  | -0.273120 | 0.373752  | -0.464916 |
| 6                  | -1.716257 | -0.105458 | -0.227311 |

|          |           |           |           |
|----------|-----------|-----------|-----------|
| 1        | 2.148204  | -0.461769 | -1.694817 |
| 1        | 2.746833  | -1.352124 | -0.264711 |
| 1        | 0.338705  | -1.657197 | -0.710856 |
| 8        | 0.689472  | -1.045045 | 1.241427  |
| 1        | -0.096419 | -1.563923 | 1.440213  |
| 1        | -0.213692 | 0.613523  | -1.532398 |
| 7        | -0.061704 | 1.602081  | 0.299692  |
| 1        | 0.682582  | 2.151210  | -0.108702 |
| 1        | 0.248481  | 1.350806  | 1.234062  |
| 8        | -2.070417 | -1.245200 | -0.403170 |
| 8        | -2.540687 | 0.859370  | 0.176426  |
| 1        | -1.959812 | 1.638210  | 0.319741  |
| IIg-g-g  |           |           |           |
| 9        | 2.269409  | 0.959194  | 0.595909  |
| 6        | 1.514515  | 0.911340  | -0.583160 |
| 6        | 0.739408  | -0.390773 | -0.582917 |
| 6        | -0.373687 | -0.418395 | 0.489056  |
| 6        | -1.482924 | 0.550516  | 0.061390  |
| 1        | 0.857940  | 1.778749  | -0.599396 |
| 1        | 2.217783  | 0.930803  | -1.416082 |
| 1        | 0.282657  | -0.529582 | -1.567640 |
| 8        | 1.626118  | -1.485064 | -0.407763 |
| 1        | 2.253587  | -1.235916 | 0.280512  |
| 1        | 0.040297  | -0.050211 | 1.432491  |
| 7        | -0.914578 | -1.774389 | 0.572269  |
| 1        | -1.263166 | -1.970777 | 1.502145  |
| 1        | -0.179248 | -2.442371 | 0.370499  |
| 8        | -1.387838 | 1.747815  | 0.159384  |
| 8        | -2.547647 | -0.052750 | -0.474298 |
| 1        | -2.362190 | -1.012689 | -0.387603 |
| IIggtt   |           |           |           |
| 9        | 3.118369  | 0.397680  | 0.061490  |
| 6        | 2.019458  | -0.197604 | 0.678740  |
| 6        | 0.762568  | 0.286218  | -0.010856 |
| 6        | -0.489293 | -0.378745 | 0.558782  |
| 6        | -1.730967 | 0.443492  | 0.159571  |
| 1        | 2.139723  | -1.278769 | 0.581781  |
| 1        | 2.028625  | 0.092877  | 1.731706  |
| 1        | 0.666752  | 1.367393  | 0.125800  |
| 8        | 0.791821  | -0.044104 | -1.392346 |
| 1        | 1.559981  | 0.380900  | -1.784685 |
| 1        | -0.452909 | -0.319408 | 1.650734  |
| 7        | -0.659443 | -1.775276 | 0.158968  |
| 1        | -0.194285 | -1.937476 | -0.727637 |
| 1        | -0.287561 | -2.419137 | 0.842448  |
| 8        | -1.768457 | 1.642227  | 0.252762  |
| 8        | -2.762033 | -0.295335 | -0.250614 |
| 1        | -2.435313 | -1.218939 | -0.230274 |
| III'ggg- |           |           |           |
| 9        | 2.515192  | 1.009004  | -0.702051 |
| 6        | 2.221186  | -0.137062 | 0.032729  |
| 6        | 0.799369  | -0.563564 | -0.274985 |
| 6        | -0.215577 | 0.498737  | 0.149818  |

|                 |           |           |           |
|-----------------|-----------|-----------|-----------|
| 6               | -1.609170 | 0.082035  | -0.294588 |
| 1               | 2.915491  | -0.923267 | -0.264096 |
| 1               | 2.337227  | 0.096012  | 1.090267  |
| 1               | 0.708544  | -0.715553 | -1.357106 |
| 8               | 0.598402  | -1.781876 | 0.422257  |
| 1               | -0.252954 | -2.125005 | 0.125406  |
| 1               | 0.032544  | 1.441478  | -0.343407 |
| 7               | -0.155473 | 0.702161  | 1.593887  |
| 1               | -0.343410 | -0.171199 | 2.073088  |
| 1               | -0.834772 | 1.389578  | 1.893808  |
| 8               | -1.951529 | -1.042154 | -0.590044 |
| 8               | -2.472284 | 1.116127  | -0.273974 |
| 1               | -3.342338 | 0.763989  | -0.510377 |
| Ig-gg-          |           |           |           |
| 9               | 0.372784  | -2.109470 | 0.433759  |
| 6               | 1.325902  | -1.308971 | -0.187985 |
| 6               | 1.139978  | 0.131159  | 0.248539  |
| 6               | -0.056930 | 0.844697  | -0.405411 |
| 6               | -1.361176 | 0.153117  | -0.050600 |
| 1               | 2.314179  | -1.652925 | 0.117443  |
| 1               | 1.212353  | -1.421238 | -1.268152 |
| 1               | 0.990754  | 0.143461  | 1.337845  |
| 8               | 2.323685  | 0.808843  | -0.111488 |
| 1               | 2.104487  | 1.749640  | -0.057315 |
| 1               | 0.087034  | 0.814001  | -1.487084 |
| 7               | -0.017834 | 2.233803  | 0.041545  |
| 1               | -0.432058 | 2.294773  | 0.967000  |
| 1               | -0.572137 | 2.822280  | -0.567893 |
| 8               | -1.964814 | 0.337710  | 0.977075  |
| 8               | -1.770439 | -0.688843 | -1.017086 |
| 1               | -2.557195 | -1.142827 | -0.682790 |
| Ig-gg           |           |           |           |
| 9               | 1.868069  | 1.341207  | 0.548522  |
| 6               | 1.485758  | 0.862735  | -0.697044 |
| 6               | 0.820866  | -0.489726 | -0.572917 |
| 6               | -0.328524 | -0.520643 | 0.461367  |
| 6               | -1.485174 | 0.337567  | -0.019437 |
| 1               | 0.808230  | 1.594157  | -1.141455 |
| 1               | 2.383531  | 0.766652  | -1.309304 |
| 1               | 0.397160  | -0.734600 | -1.561176 |
| 8               | 1.797361  | -1.432915 | -0.205802 |
| 1               | 1.303747  | -2.180107 | 0.163125  |
| 1               | 0.058649  | -0.123201 | 1.399616  |
| 7               | -0.716628 | -1.913859 | 0.644195  |
| 1               | -1.381461 | -2.174969 | -0.077450 |
| 1               | -1.178976 | -2.043437 | 1.534780  |
| 8               | -2.392079 | -0.070457 | -0.704113 |
| 8               | -1.382264 | 1.620047  | 0.377812  |
| 1               | -2.141614 | 2.091183  | 0.005132  |
| GlyDA. 16 atoms |           |           |           |
| C5              |           |           |           |
| 6               | 0.528249  | 0.648633  | -0.000000 |

|   |           |           |           |
|---|-----------|-----------|-----------|
| 7 | -0.543601 | -0.307055 | 0.000000  |
| 6 | -1.838102 | 0.096007  | -0.000000 |
| 6 | -2.872182 | -1.006332 | 0.000000  |
| 8 | -2.143659 | 1.281127  | -0.000000 |
| 1 | -0.275765 | -1.278847 | 0.000000  |
| 1 | -2.434606 | -2.004752 | 0.000000  |
| 1 | -3.504539 | -0.889187 | 0.880304  |
| 1 | -3.504539 | -0.889187 | -0.880304 |
| 6 | 1.851809  | -0.099548 | 0.000000  |
| 7 | 2.950520  | 0.694531  | -0.000000 |
| 1 | 3.858188  | 0.263449  | 0.000000  |
| 1 | 2.882249  | 1.695516  | -0.000000 |
| 8 | 1.912862  | -1.317676 | 0.000000  |
| 1 | 0.472476  | 1.300283  | 0.877962  |
| 1 | 0.472476  | 1.300283  | -0.877962 |

C7

|   |           |           |           |
|---|-----------|-----------|-----------|
| 6 | -0.647267 | 0.712694  | -0.828782 |
| 7 | 0.605240  | 0.943333  | -0.128387 |
| 6 | 1.567924  | -0.007045 | -0.036292 |
| 6 | 2.827616  | 0.388666  | 0.694829  |
| 8 | 1.427325  | -1.124181 | -0.525449 |
| 1 | 0.729848  | 1.813250  | 0.358476  |
| 1 | 2.804342  | 1.410789  | 1.072890  |
| 1 | 2.979230  | -0.300994 | 1.525323  |
| 1 | 3.670665  | 0.276842  | 0.012631  |
| 6 | -1.684260 | -0.016520 | 0.028793  |
| 7 | -1.370101 | -1.305676 | 0.297256  |
| 1 | -1.971352 | -1.826956 | 0.911544  |
| 1 | -0.477883 | -1.679287 | 0.005949  |
| 8 | -2.698701 | 0.538547  | 0.417535  |
| 1 | -0.431422 | 0.129986  | -1.726114 |
| 1 | -1.074377 | 1.672206  | -1.110106 |

AlaDA

C5

|   |           |           |           |
|---|-----------|-----------|-----------|
| 1 | -3.703750 | 0.245172  | 0.717712  |
| 7 | -2.837357 | -0.261690 | 0.665841  |
| 6 | -1.755065 | 0.354082  | 0.129618  |
| 8 | -1.792553 | 1.492588  | -0.309079 |
| 1 | -2.776369 | -1.171800 | 1.083135  |
| 6 | -0.490838 | -0.497712 | 0.069577  |
| 7 | 0.617090  | 0.395274  | -0.169628 |
| 6 | 1.889729  | 0.044875  | 0.144024  |
| 6 | 2.943239  | 1.097453  | -0.116009 |
| 1 | 2.529834  | 2.036596  | -0.484073 |
| 1 | 3.488198  | 1.278820  | 0.810460  |
| 1 | 3.652055  | 0.705968  | -0.846404 |
| 1 | 0.380822  | 1.324946  | -0.480547 |
| 8 | 2.168298  | -1.056246 | 0.601478  |
| 1 | -0.331703 | -0.993556 | 1.031986  |
| 6 | -0.609696 | -1.564153 | -1.024383 |
| 1 | -0.796951 | -1.090812 | -1.990042 |

C7eq



|   |           |           |           |
|---|-----------|-----------|-----------|
| 1 | -1.424182 | -2.259848 | -0.812407 |
| 1 | 0.323673  | -2.123836 | -1.073158 |
| 1 | -1.422824 | 2.540620  | 0.327536  |
| 7 | -0.996981 | 1.760328  | -0.143139 |
| 6 | -1.472392 | 0.520384  | 0.126140  |
| 8 | -2.466280 | 0.300508  | 0.797925  |
| 1 | -0.087357 | 1.861343  | -0.572917 |
| 6 | -0.636713 | -0.609382 | -0.502608 |
| 7 | 0.617615  | -0.765410 | 0.227019  |
| 6 | 1.709199  | 0.002081  | -0.010536 |
| 6 | 2.939585  | -0.322055 | 0.802293  |
| 1 | 2.789201  | -1.142157 | 1.504520  |
| 1 | 3.747125  | -0.579530 | 0.116462  |
| 1 | 3.240929  | 0.571692  | 1.348856  |
| 1 | 0.648761  | -1.445246 | 0.968061  |
| 8 | 1.705740  | 0.905597  | -0.842529 |
| 1 | -0.367857 | -0.311968 | -1.518787 |
| 6 | -1.398954 | -1.920130 | -0.508018 |
| 1 | -1.663022 | -2.214508 | 0.508968  |
| 1 | -0.796778 | -2.702827 | -0.972099 |
| 1 | -2.329233 | -1.810700 | -1.064066 |

Uridine 29 atoms

|   |           |           |           |
|---|-----------|-----------|-----------|
| 1 | -1.019815 | 2.796757  | 1.874773  |
| 8 | -1.194013 | 2.011397  | 1.351085  |
| 6 | -2.199282 | 2.309258  | 0.389296  |
| 1 | -1.880631 | 3.123227  | -0.271186 |
| 1 | -3.138554 | 2.601389  | 0.873697  |
| 6 | -2.453269 | 1.074168  | -0.446479 |
| 1 | -3.254255 | 1.289860  | -1.156363 |
| 8 | -1.283198 | 0.735987  | -1.218716 |
| 6 | -0.663717 | -0.411790 | -0.714547 |
| 1 | -0.671959 | -1.206855 | -1.464770 |
| 7 | 0.759524  | -0.105005 | -0.426761 |
| 6 | 1.294389  | 1.150521  | -0.583831 |
| 1 | 0.585195  | 1.897573  | -0.901672 |
| 6 | 2.597647  | 1.420783  | -0.364745 |
| 1 | 2.993576  | 2.415553  | -0.497294 |
| 6 | 3.499506  | 0.365643  | 0.051414  |
| 8 | 4.688284  | 0.468258  | 0.285128  |
| 7 | 2.860213  | -0.879569 | 0.176613  |
| 1 | 3.435630  | -1.655791 | 0.472831  |
| 6 | 1.537473  | -1.169884 | -0.030752 |
| 8 | 1.080961  | -2.297628 | 0.127823  |
| 6 | -2.802906 | -0.182303 | 0.339834  |
| 1 | -3.283894 | 0.052137  | 1.294926  |
| 6 | -1.443961 | -0.856054 | 0.541140  |
| 1 | -0.955048 | -0.448653 | 1.429277  |
| 8 | -1.629439 | -2.246896 | 0.634256  |
| 1 | -0.749274 | -2.641251 | 0.534153  |
| 8 | -3.640718 | -0.983702 | -0.467278 |
| 1 | -3.410262 | -1.900874 | -0.269659 |

| Testosterone 49 atoms |           |           |           |
|-----------------------|-----------|-----------|-----------|
| 6                     | -0.486311 | -1.728081 | 0.052236  |
| 6                     | 0.267171  | -0.400468 | -0.138413 |
| 6                     | -0.561218 | 0.812748  | 0.333261  |
| 6                     | -1.929253 | 0.756427  | -0.330789 |
| 6                     | -2.705760 | -0.533725 | -0.031853 |
| 6                     | -1.893619 | -1.711434 | -0.558970 |
| 6                     | -4.000629 | -0.225306 | -0.804095 |
| 6                     | -4.304809 | 1.242992  | -0.460177 |
| 6                     | -2.946633 | 1.873586  | -0.058610 |
| 6                     | 0.168513  | 2.108117  | -0.004907 |
| 6                     | 1.565367  | 2.127851  | 0.610438  |
| 6                     | -3.027714 | -0.713862 | 1.455235  |
| 8                     | -5.128424 | -1.028639 | -0.484059 |
| 1                     | -4.990553 | -1.905469 | -0.851893 |
| 6                     | 3.607308  | 1.058000  | -0.278984 |
| 6                     | 4.512759  | -0.068323 | -0.550256 |
| 8                     | 5.609315  | 0.095027  | -1.060334 |
| 6                     | 2.365086  | 0.916280  | 0.222136  |
| 1                     | -1.743845 | 0.752103  | -1.417260 |
| 1                     | -0.695480 | 0.768308  | 1.421675  |
| 1                     | 0.398408  | -0.260226 | -1.223238 |
| 1                     | -2.939528 | 2.149697  | 0.999448  |
| 1                     | -2.726235 | 2.778256  | -0.627186 |
| 1                     | 0.247696  | 2.198517  | -1.095466 |
| 1                     | -0.403628 | 2.970695  | 0.347885  |
| 1                     | -2.393414 | -2.664141 | -0.347047 |
| 1                     | -1.811269 | -1.625151 | -1.650013 |
| 1                     | -3.781134 | -0.316308 | -1.877288 |
| 1                     | -3.613062 | 0.117926  | 1.849638  |
| 1                     | -3.620007 | -1.619655 | 1.597360  |
| 1                     | -2.125753 | -0.801104 | 2.061451  |
| 1                     | -4.769951 | 1.755493  | -1.302939 |
| 1                     | -5.021643 | 1.263254  | 0.362666  |
| 1                     | -0.562400 | -1.961032 | 1.117247  |
| 1                     | 2.108656  | 3.032494  | 0.328328  |
| 1                     | 1.465686  | 2.145263  | 1.702935  |
| 1                     | 4.020657  | 2.046484  | -0.455275 |
| 1                     | 0.082303  | -2.542822 | -0.401354 |
| 6                     | 4.018610  | -1.421989 | -0.099300 |
| 1                     | 4.552025  | -2.192946 | -0.657125 |
| 1                     | 4.296208  | -1.534438 | 0.954853  |
| 6                     | 2.508572  | -1.538427 | -0.274371 |
| 1                     | 2.278274  | -1.482567 | -1.344641 |
| 1                     | 2.177683  | -2.520112 | 0.071299  |
| 6                     | 1.712016  | -0.438399 | 0.452001  |
| 6                     | 1.703004  | -0.718430 | 1.967541  |
| 1                     | 2.714636  | -0.653994 | 2.373730  |
| 1                     | 1.085827  | -0.002379 | 2.511900  |
| 1                     | 1.321574  | -1.719558 | 2.175416  |

Triptamine 24 atoms  
 Conformer I

|   |           |           |           |
|---|-----------|-----------|-----------|
| 6 | 0.781625  | 1.734814  | -0.361576 |
| 6 | 0.908288  | 0.387864  | -0.585959 |
| 6 | -0.380584 | -0.189070 | -0.301297 |
| 6 | -1.241155 | 0.867433  | 0.086036  |
| 7 | -0.506040 | 2.028551  | 0.043181  |
| 6 | -2.579609 | 0.655126  | 0.425341  |
| 6 | -3.052382 | -0.646814 | 0.370865  |
| 6 | -2.216127 | -1.713162 | -0.013828 |
| 6 | -0.889472 | -1.496946 | -0.349187 |
| 1 | -3.226519 | 1.474200  | 0.718786  |
| 1 | -4.085655 | -0.848210 | 0.627557  |
| 1 | -2.622174 | -2.717171 | -0.047238 |
| 1 | -0.255895 | -2.325302 | -0.646313 |
| 1 | 1.520022  | 2.515772  | -0.461490 |
| 1 | -0.854136 | 2.947165  | 0.248189  |
| 6 | 2.147172  | -0.345378 | -0.993875 |
| 6 | 2.777707  | -1.115026 | 0.168260  |
| 1 | 2.883674  | 0.363613  | -1.380864 |
| 1 | 1.912486  | -1.049481 | -1.798965 |
| 7 | 3.210022  | -0.180124 | 1.206792  |
| 1 | 3.658902  | -1.650933 | -0.194152 |
| 1 | 2.060872  | -1.866028 | 0.529512  |
| 1 | 2.402634  | 0.315152  | 1.569947  |
| 1 | 3.621276  | -0.680960 | 1.985207  |

Conformer II

|   |           |           |           |
|---|-----------|-----------|-----------|
| 6 | 0.755357  | 1.765651  | -0.345189 |
| 6 | 0.901697  | 0.423658  | -0.587386 |
| 6 | -0.377984 | -0.175421 | -0.306339 |
| 6 | -1.252685 | 0.862977  | 0.096634  |
| 7 | -0.535373 | 2.035616  | 0.066220  |
| 6 | -2.586866 | 0.626701  | 0.437028  |
| 6 | -3.040291 | -0.681178 | 0.366883  |
| 6 | -2.189552 | -1.730058 | -0.033811 |
| 6 | -0.867337 | -1.490096 | -0.369700 |
| 1 | -3.244760 | 1.432159  | 0.743298  |
| 1 | -4.069519 | -0.901317 | 0.624281  |
| 1 | -2.580568 | -2.739516 | -0.078259 |
| 1 | -0.222791 | -2.305559 | -0.678568 |
| 1 | 1.477576  | 2.561905  | -0.444521 |
| 1 | -0.896460 | 2.945986  | 0.284913  |
| 6 | 2.145980  | -0.291343 | -1.004702 |
| 6 | 2.776542  | -1.101311 | 0.141788  |
| 1 | 2.880069  | 0.432448  | -1.374592 |
| 1 | 1.923544  | -0.970373 | -1.836200 |
| 7 | 3.209999  | -0.323024 | 1.296790  |
| 1 | 3.640910  | -1.650643 | -0.240962 |
| 1 | 2.057137  | -1.845613 | 0.493228  |
| 1 | 3.917241  | 0.348916  | 1.019613  |
| 1 | 2.429082  | 0.214478  | 1.657651  |

Serotonine 25 atoms

Conformer I

|   |          |           |           |
|---|----------|-----------|-----------|
| 6 | 2.092327 | -0.927100 | -0.136307 |
|---|----------|-----------|-----------|

|   |           |           |           |
|---|-----------|-----------|-----------|
| 6 | 2.746661  | 0.253261  | 0.269133  |
| 6 | 2.044499  | 1.435751  | 0.421804  |
| 6 | 0.672353  | 1.419407  | 0.160457  |
| 6 | 0.001846  | 0.242609  | -0.245895 |
| 6 | 0.733550  | -0.950671 | -0.394729 |
| 6 | -1.384148 | 0.580945  | -0.436520 |
| 6 | -1.492634 | 1.919901  | -0.145242 |
| 7 | -0.265310 | 2.427131  | 0.219427  |
| 1 | 3.811833  | 0.211553  | 0.459024  |
| 1 | 0.236264  | -1.870048 | -0.687075 |
| 1 | 2.552439  | 2.341236  | 0.733706  |
| 8 | 2.884941  | -2.042619 | -0.252377 |
| 1 | 2.336035  | -2.782185 | -0.527250 |
| 1 | -2.362472 | 2.558546  | -0.180344 |
| 1 | -0.079013 | 3.385213  | 0.451955  |
| 6 | -2.496439 | -0.331825 | -0.855518 |
| 6 | -3.109568 | -1.120497 | 0.302511  |
| 1 | -2.129810 | -1.041672 | -1.603339 |
| 1 | -3.287229 | 0.257867  | -1.328967 |
| 7 | -2.123992 | -2.029151 | 0.890331  |
| 1 | -3.530128 | -0.407211 | 1.026212  |
| 1 | -3.936230 | -1.726189 | -0.079333 |
| 1 | -1.371812 | -1.494524 | 1.311941  |
| 1 | -2.547395 | -2.570833 | 1.634393  |

Conformer II

|   |           |           |           |
|---|-----------|-----------|-----------|
| 6 | 2.264968  | -0.887211 | 0.003885  |
| 6 | 2.804267  | 0.357932  | 0.382389  |
| 6 | 2.010734  | 1.490907  | 0.425273  |
| 6 | 0.662862  | 1.358733  | 0.084234  |
| 6 | 0.106341  | 0.115914  | -0.295537 |
| 6 | 0.930025  | -1.023986 | -0.334194 |
| 6 | -1.284500 | 0.338496  | -0.586983 |
| 6 | -1.510817 | 1.676493  | -0.372966 |
| 7 | -0.347462 | 2.294448  | 0.031524  |
| 1 | 3.855477  | 0.406274  | 0.637130  |
| 1 | 0.530848  | -1.991184 | -0.625321 |
| 1 | 2.432317  | 2.446787  | 0.714579  |
| 8 | 3.143764  | -1.942636 | -0.005901 |
| 1 | 2.674278  | -2.733987 | -0.282792 |
| 1 | -2.426176 | 2.238151  | -0.481632 |
| 1 | -0.247941 | 3.273479  | 0.227153  |
| 6 | -2.291115 | -0.692080 | -0.991492 |
| 6 | -2.710621 | -1.587498 | 0.175927  |
| 1 | -1.879473 | -1.319507 | -1.789318 |
| 1 | -3.182691 | -0.199820 | -1.388520 |
| 7 | -3.375166 | -0.785477 | 1.202378  |
| 1 | -3.421828 | -2.335708 | -0.184001 |
| 1 | -1.827031 | -2.125526 | 0.548644  |
| 1 | -3.646595 | -1.366451 | 1.986358  |
| 1 | -2.725733 | -0.093106 | 1.560056  |

Conformer III

|   |          |           |           |
|---|----------|-----------|-----------|
| 6 | 2.247396 | -0.902946 | -0.005152 |
| 6 | 2.802472 | 0.331520  | 0.385947  |

|   |           |           |           |
|---|-----------|-----------|-----------|
| 6 | 2.024303  | 1.474362  | 0.438811  |
| 6 | 0.675216  | 1.363157  | 0.094716  |
| 6 | 0.103076  | 0.131830  | -0.297716 |
| 6 | 0.911412  | -1.018633 | -0.346626 |
| 6 | -1.284457 | 0.375238  | -0.589165 |
| 6 | -1.492958 | 1.714067  | -0.361962 |
| 7 | -0.322149 | 2.313046  | 0.049438  |
| 1 | 3.853641  | 0.363135  | 0.643382  |
| 1 | 0.500481  | -1.977711 | -0.647880 |
| 1 | 2.457929  | 2.421588  | 0.738439  |
| 8 | 3.112283  | -1.968959 | -0.023644 |
| 1 | 2.630920  | -2.754627 | -0.296365 |
| 1 | -2.397373 | 2.292945  | -0.473554 |
| 1 | -0.209912 | 3.288361  | 0.256260  |
| 6 | -2.298701 | -0.641630 | -1.002819 |
| 6 | -2.704140 | -1.577738 | 0.149187  |
| 1 | -1.904464 | -1.246816 | -1.828045 |
| 1 | -3.193396 | -0.136222 | -1.381808 |
| 7 | -3.328794 | -0.928568 | 1.296203  |
| 1 | -1.818380 | -2.107756 | 0.509793  |
| 1 | -3.395272 | -2.335384 | -0.230099 |
| 1 | -2.716299 | -0.201695 | 1.650571  |
| 1 | -4.186387 | -0.467768 | 1.012110  |
